# Supplementary material
Source: Elsevier journal article supplement (https://rcastoragev2.blob.core.windows.net/451c7f0994df8eb90979c312a55f2bcf/mmc1.pdf)
Supplement: mmc1 [file mmc1.pdf]

## Supplemental Information

### RUNX Transcription Factor-Mediated Association

#### of *Cd4* and *Cd8* Enables Coordinate Gene Regulation

Amélie Collins, Susannah L. Hewitt, Julie Chaumeil, MacLean Sellars, Mariann Micsinai, Jeanne Allinne, Fabio Parisi, Elphège Nora, Dan J. Bolland, Anne E. Corcoran, Yuval Kluger, Remy Bosselut, Wilfried Ellmeier, Mark M.W. Chong, Dan R. Littman, and Jane A. Skok

#### Inventory

**Figure S1. Schematic of DNA FISH probes used on murine chromosome 6 and supplemental data for wild-type thymocytes, related to Figure 1**

Parts A to C describe details of our methodology to guide the reader through Figure 1. Part A details all probes used in the experiments and chromosomal distances between them. Part B describes the developmental stages of thymocyte differentiation and part C details our sorting protocol of these stages.

Part D shows the pericentromeric recruitment of *Cd4* and *Cd8* in WT cells to accompany the Cd4-Cd8 association in Figure 1, as described in the text and as referred to later in the manuscript when genetic manipulations are used.

**Figure S2. Scheme of the *Cd8* locus with enhancers detailed and sorting strategy for *E8<sub>I</sub>* deficient or *E8<sub>I</sub>E8<sub>II</sub>* double mutant thymocytes, related to Figure 2**

Part A shows the position of enhancers that were deleted in the cells used in Figure 2.

Parts B and C detail the sorting strategy for these cells in Figure 2, as even though CD4 and CD8 change on the cell surface in many of the genetic manipulations used in the manuscript, these populations can still be accurately sorted using other markers.

**Figure S3. Sorting strategy for *Cbfb*<sup>F/F</sup>/*Lck-cre* thymocytes, related to Figure 3.**

This details the particular sorting strategy required *Cbfb* deficient thymocytes used in Figure 2.

**Figure S4. Generation of *Zbtb7b*<sup>hd/hd</sup> mice and sorting strategy for *Zbtb7b*<sup>hd/hd</sup> or ThPOK transgenic cells, related to Figure 4**

Parts A to D detail the gene targeting strategy, and additionally PCR verification of *Zbtb7b*<sup>hd/hd</sup> mice used in Figure 4. Parts E and F describe the particular strategy employed to accurately sort genetically manipulated cells shown in Figure 4.

**Figure S5. Scheme of the *Cd4* locus showing the proximal enhancer (PE) and sorting strategy for *Cd4* PE deficient thymocytes, related to Figure 5**

This scheme of which enhancer is deleted and the sorting strategy for cells used in Figure 5.

**Figure S6. Scheme of the *Cd4* locus showing the silencer (sil) and sorting strategy for *Cd4* PE deficient thymocytes, related to Figure 6**

This scheme of which enhancer is deleted and the sorting strategy for cells used in Figure 6.

**Figure S7. Sorting strategy for human lymphocytes CD8<sup>+</sup> T cells, CD4<sup>+</sup> T cells, or B cells and a model of *Cd4*-*Cd8* association during T cell development, related to Figure 7**

Part A describes how human lymphocytes were sorted and Part B places our data into a proposed model during

thymocyte differentiation.

### **Supplementary Tables**

Supplementary Tables give full experimental data of recruitment to pericentromeric heterochromatin, for one representative experiment of each genotype used.

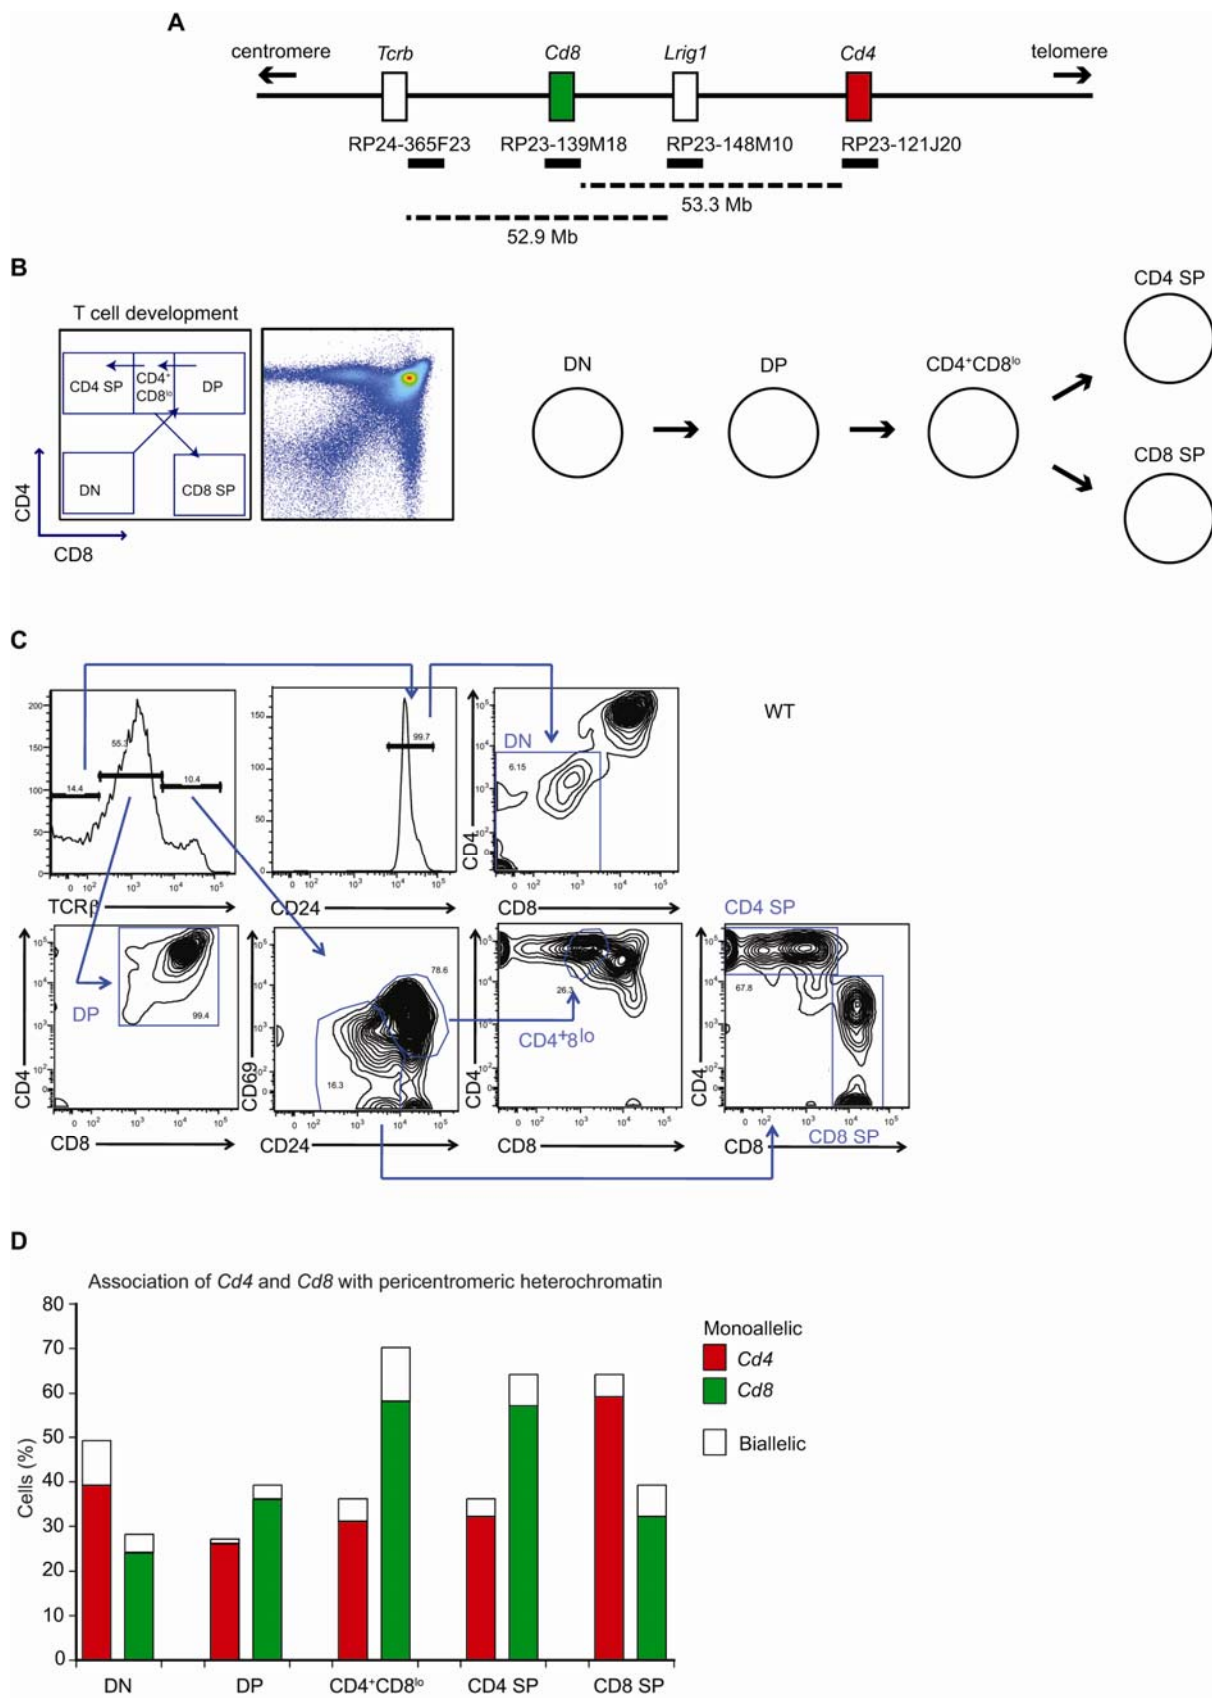

**Figure S1. Schematic of DNA FISH probes used on murine chromosome 6 and supplemental data for wild-type thymocytes, related to Figure 1**

(A) Location of the *Cd4* and *Cd8* loci on chromosome 6 and the BAC probes used for 3-D DNA FISH on *ex vivo* sorted cells (RP23-121J20 and RP23-139M18 for *Cd4* and *Cd8*, respectively). Also shown is the location and separation of *Tcrb* – *Lrig1* and the BAC probes used to detect these loci (RP24-365F23 and RP23-148M10, respectively).

(B) CD4 and CD8 surface expression by flow cytometry showing T cell subsets (left) and differentiation stages (right).

(C) For wild-type cells, DN were sorted as  $\text{TCRb}^{\text{lo}}\text{CD24}^+\text{CD4}^-\text{CD8}^-$ , DP as  $\text{TCRb}^{\text{int}}\text{CD4}^+\text{CD8}^+$ ,  $\text{CD4}^+\text{8}^{\text{lo}}$  as  $\text{TCRb}^{\text{hi}}\text{CD24}^+\text{CD69}^+\text{CD4}^+\text{8}^{\text{lo}}$ , CD4 SP as  $\text{TCRb}^{\text{hi}}\text{CD24}^-\text{CD69}^-\text{CD4}^+$ , and CD8 SP as  $\text{TCRb}^{\text{hi}}\text{CD24}^-\text{CD69}^-\text{CD8}^+$ .

(D) *Cd4* or *Cd8* recruitment to pericentromeric heterochromatin in sorted wild-type thymocytes.

3-D DNA FISH with BAC probes RP23-121J20 (*Cd4*) and RP23-139M18 (*Cd8*) was combined with a  $\gamma$ -satellite probe (pericentromeric heterochromatin).

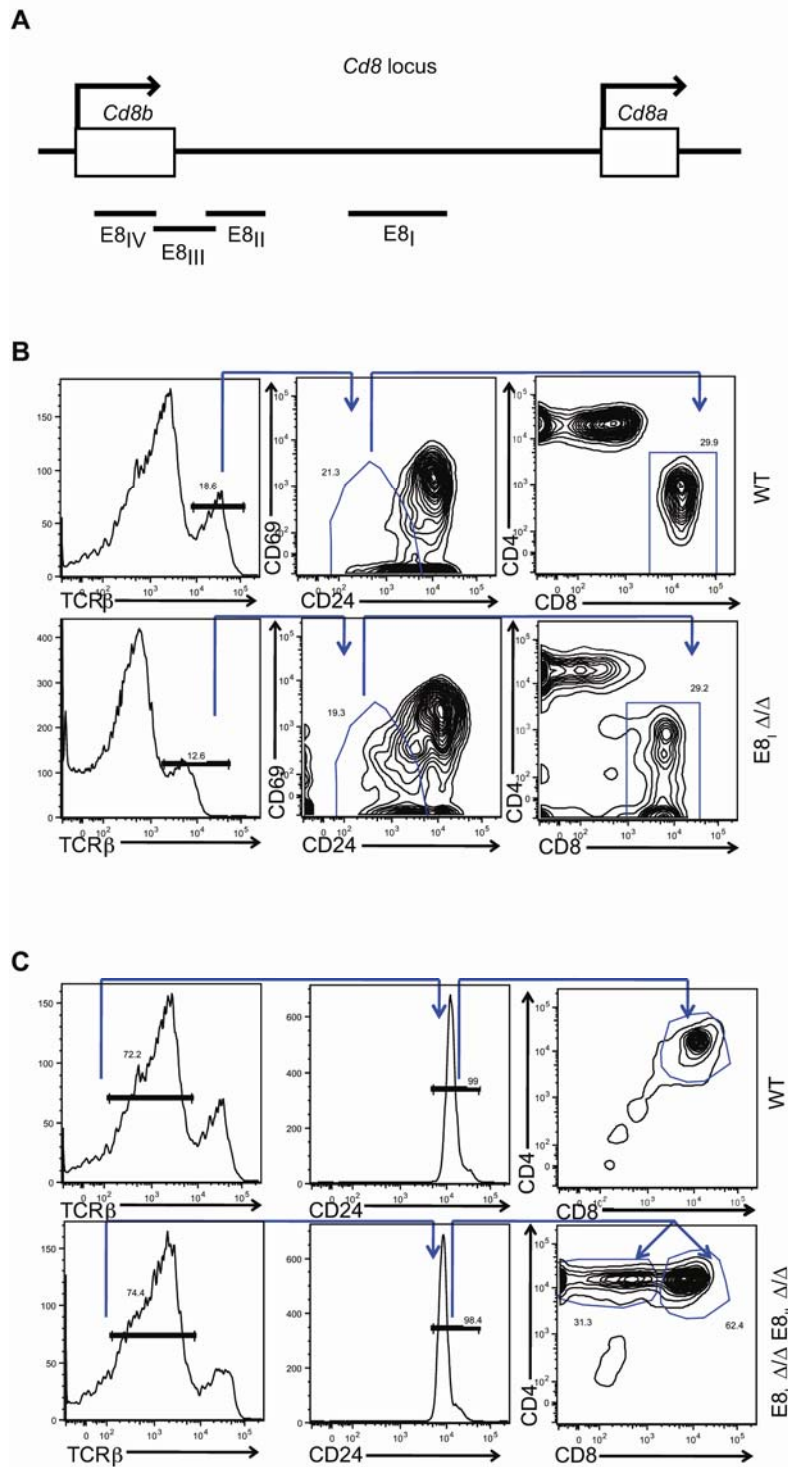

**Figure S2. Scheme of the *Cd8* locus with enhancers detailed and sorting strategy for E8<sub>I</sub> deficient or E8<sub>I</sub>E8<sub>II</sub> double mutant thymocytes, related to Figure 2**

(A) Scheme of the *Cd8* locus with enhancers detailed.

(B) For E8<sub>I</sub> deficient cells, CD8 SP were sorted as TCR $\beta$ <sup>hi</sup>CD24<sup>-</sup>CD69<sup>-</sup>CD8<sup>+</sup>.

(C) For E8<sub>I</sub>E8<sub>II</sub> double mutant cells, CD8<sup>+</sup> DP were sorted as TCR $\beta$ <sup>int</sup>CD24<sup>+</sup>CD4<sup>+</sup>CD8<sup>+</sup>, and CD8<sup>-</sup> DP as TCR $\beta$ <sup>int</sup>CD24<sup>+</sup>CD4<sup>+</sup>CD8<sup>lo</sup>.

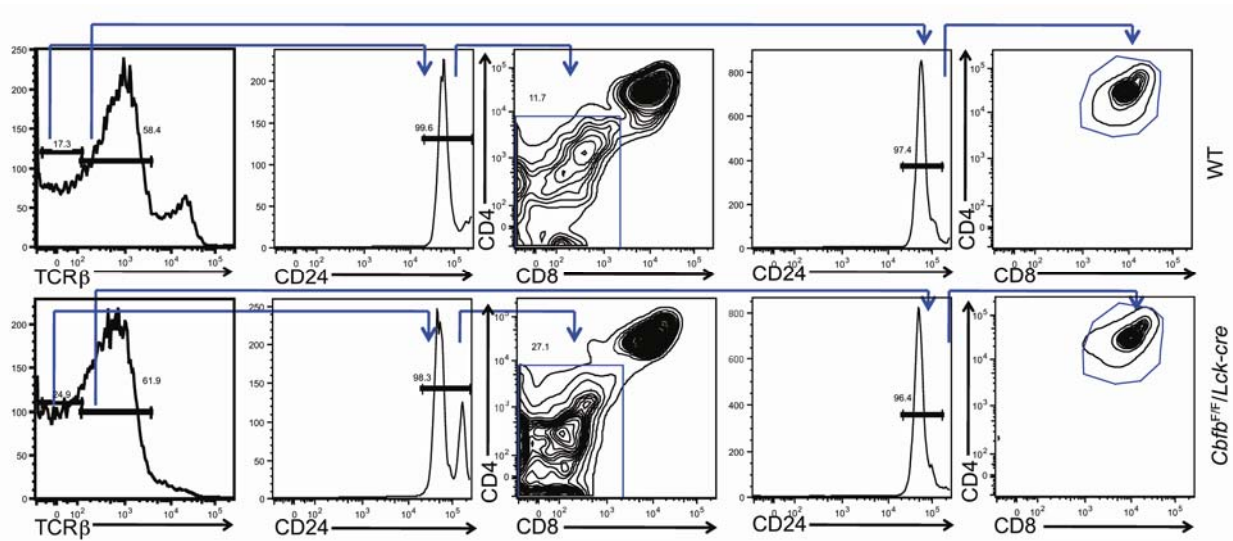

**Figure S3. Sorting strategy for *Cbfb<sup>F/F</sup>/Lck-cre* thymocytes, related to Figure 3.**

For *Cbfb<sup>F/F</sup>/Lck-cre* cells, DN were sorted as TCRβ<sup>lo</sup>CD24<sup>+</sup>CD8<sup>-</sup>, and DP as TCRβ<sup>int</sup>CD24<sup>+</sup>CD4<sup>+</sup>CD8<sup>+</sup>.

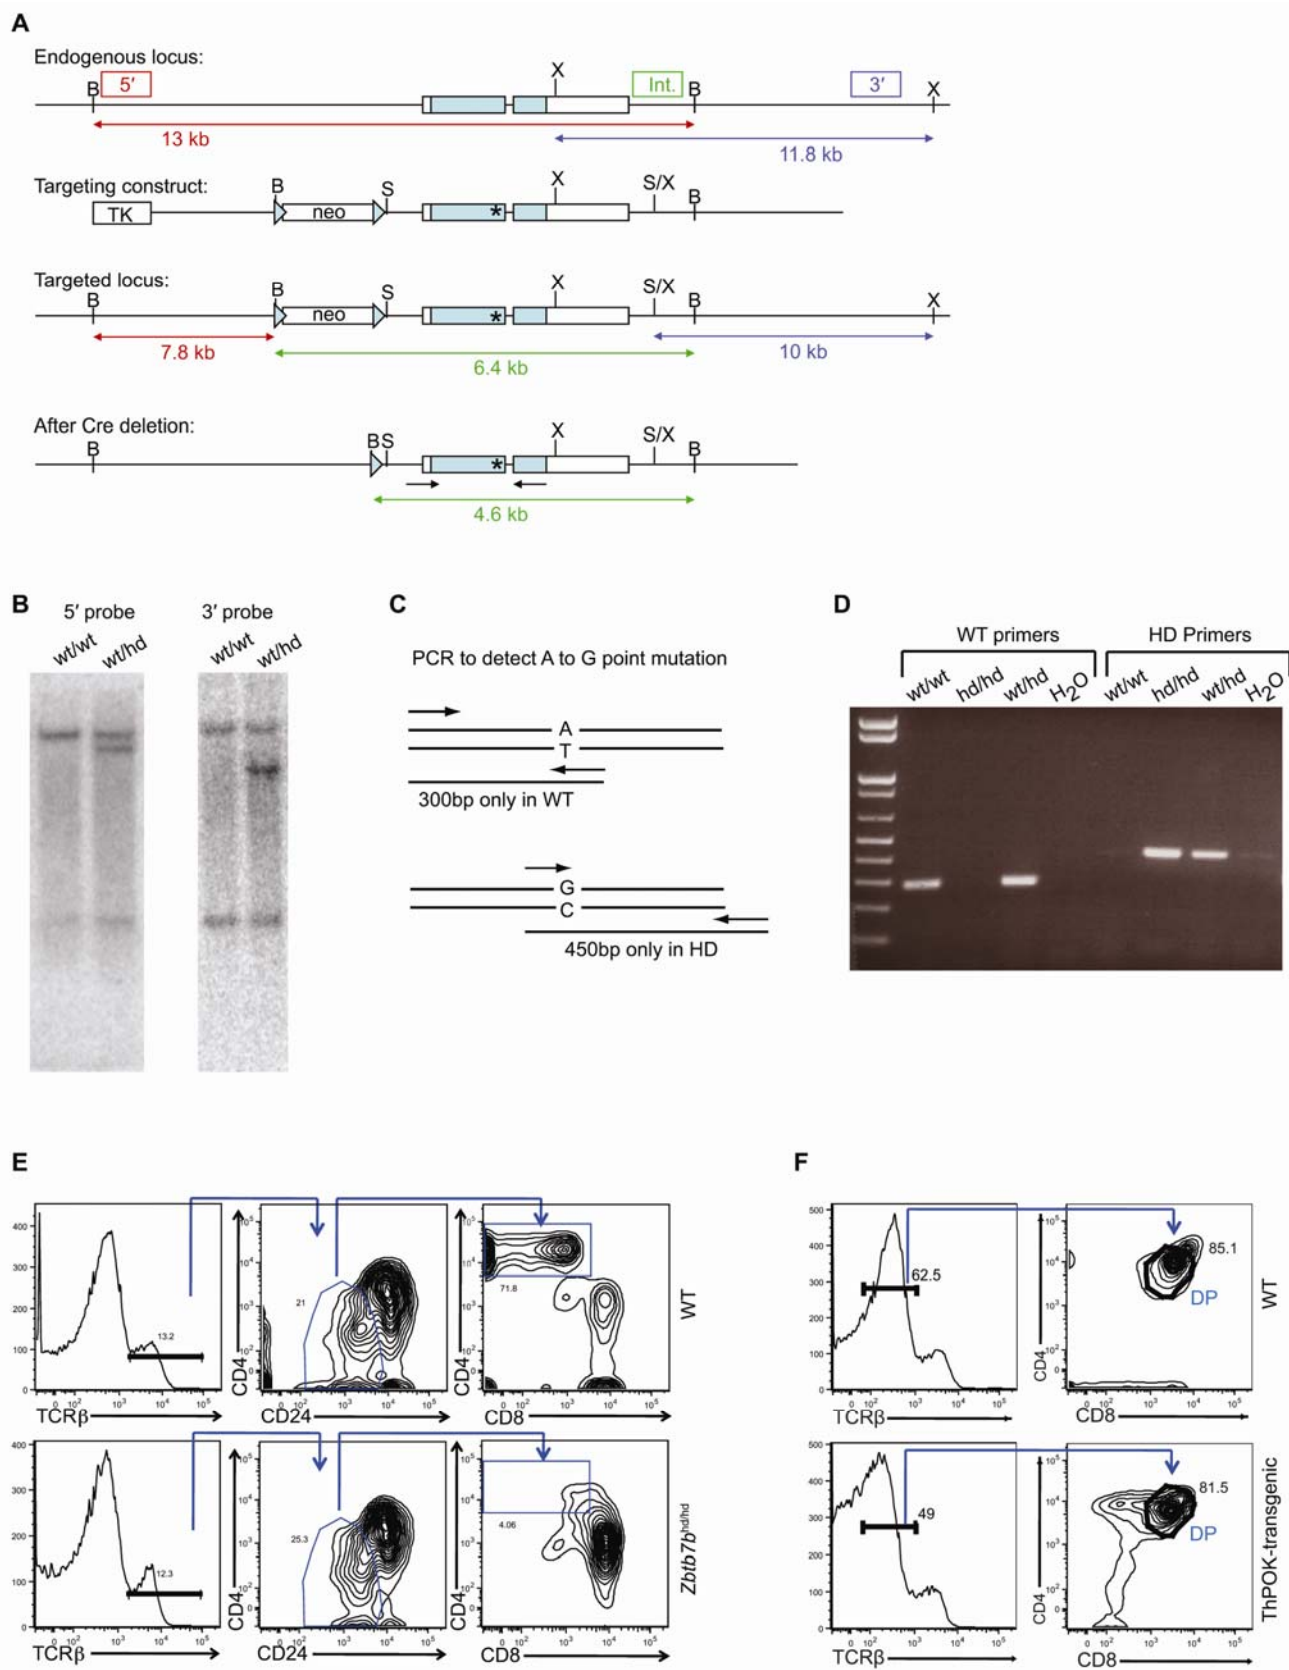

**Figure S4. Generation of *Zbtb7b*<sup>hd/hd</sup> mice and sorting strategy for *Zbtb7b*<sup>hd/hd</sup> or ThPOK transgenic cells, related to Figure 4**

- (A) Gene targeting strategy to replace the endogenous *Zbtb7b* locus with the A to G mutation at position 389. Probe locations and fragment sizes are indicated. B, BglII; X, XbaI, S, SpeI.
- (B) Southern blot analysis of untargeted (wt/wt) and targeted (wt/hd) ES cells.
- (C) PCR strategy to detect the A to G point mutation in targeted mice.
- (D) PCR analysis of tail DNA from *Zbtb7b*<sup>wt/wt</sup>, *Zbtb7b*<sup>hd/hd</sup> and *Zbtb7b*<sup>wt/hd</sup> mice.
- (E) For *Zbtb7b*<sup>hd/hd</sup> cells, CD4 SP were sorted as TCRb<sup>hi</sup>CD24<sup>-</sup>CD69<sup>-</sup>CD4<sup>+</sup>.
- (F) For ThPOK transgenic mice DP cells were sorted as TCRb<sup>int</sup>CD4<sup>+</sup>CD8<sup>+</sup>.

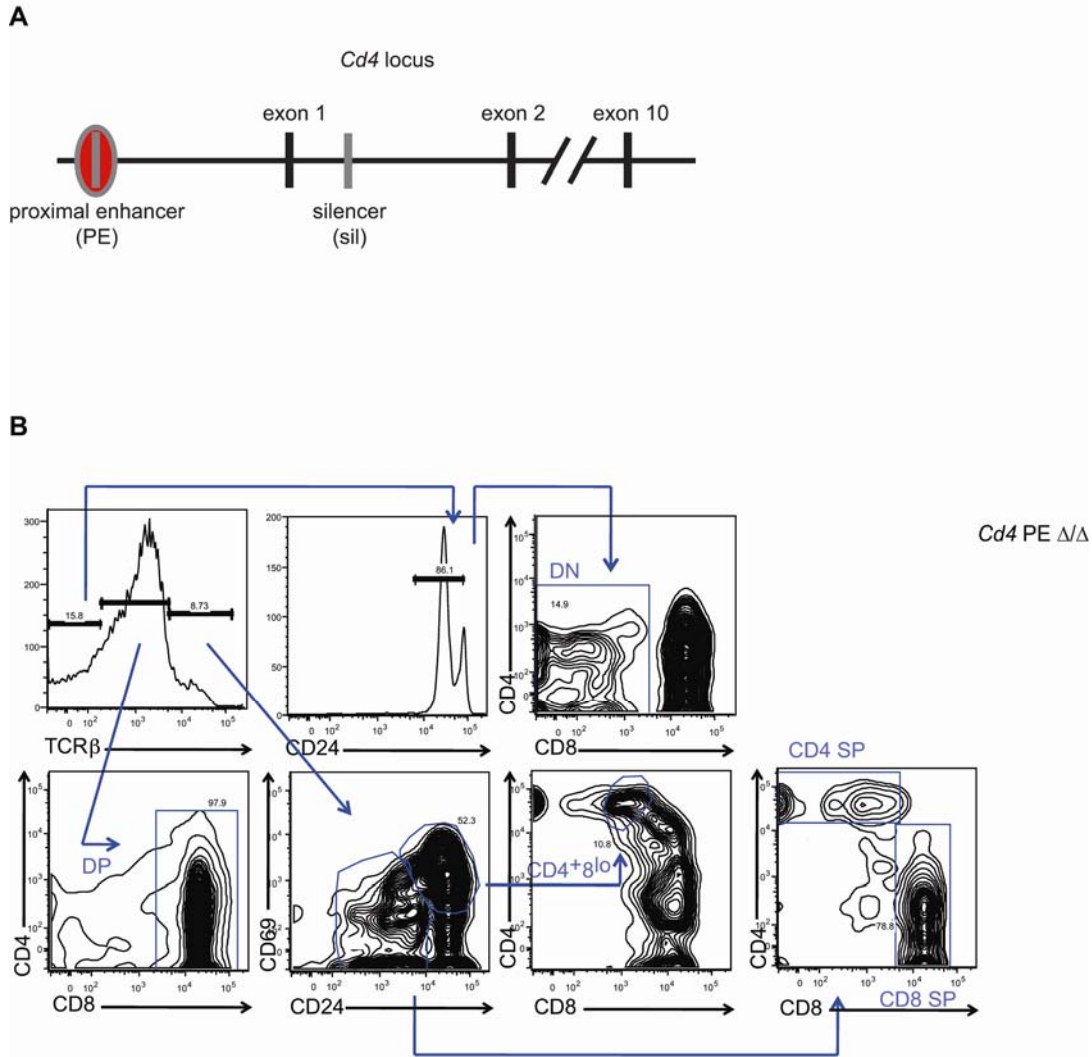

**Figure S5. Scheme of the *Cd4* locus showing the proximal enhancer (PE) and sorting strategy for *Cd4* PE deficient thymocytes, related to Figure 5**

- (A) Scheme of the *Cd4* locus showing the position of the proximal enhancer (PE) deleted in *Cd4* PE  $\Delta/\Delta$ .
- (B) For *Cd4* PE deficient cells, DN were sorted as TCRb<sup>lo</sup>CD24<sup>+</sup>CD4<sup>-</sup>CD8<sup>-</sup>, DP as TCRb<sup>int</sup>CD8<sup>+</sup>, CD4<sup>+</sup>8<sup>lo</sup> as TCRb<sup>hi</sup>CD24<sup>+</sup>CD69<sup>+</sup>CD4<sup>+</sup>8<sup>lo</sup>, CD4 SP as TCRb<sup>hi</sup>CD24<sup>-</sup>CD69<sup>-</sup>CD4<sup>+</sup>, and CD8 SP as TCRb<sup>hi</sup>CD24<sup>-</sup>CD69<sup>-</sup>CD8<sup>+</sup>.





**A**

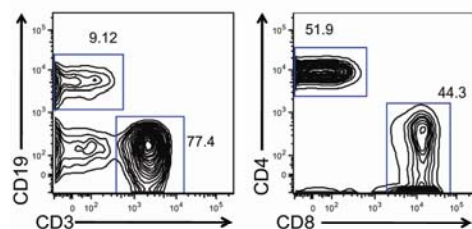

**B**

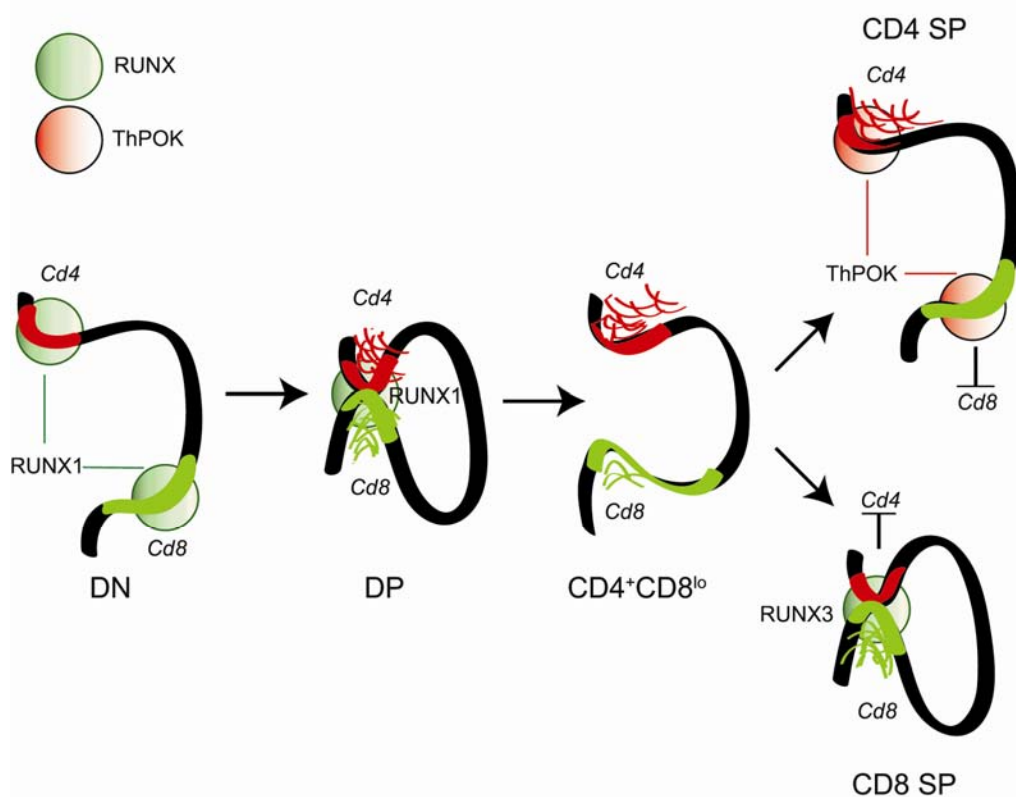

**Figure S7. Sorting strategy for human lymphocytes CD8<sup>+</sup> T cells, CD4<sup>+</sup> T cells, or B cells and a model of *Cd4*-*Cd8* association during T cell development, related to Figure 7**

(A) On a live lymphocyte gate, human B cells were sorted as CD3<sup>-</sup>CD19<sup>+</sup>, and T cells were sorted as either CD19<sup>-</sup>CD3<sup>+</sup>CD4<sup>+</sup>CD45RA<sup>+</sup>CD54RO<sup>-</sup> for CD4<sup>+</sup> cells or CD19<sup>-</sup>CD3<sup>+</sup>CD8<sup>+</sup>CD45RA<sup>+</sup>CD54RO<sup>-</sup> for CD8<sup>+</sup> cells.

(B) Model of *Cd4*-*Cd8* association during T cell development.

**Table S1. *Cd4* or *Cd8* recruitment to pericentromeric heterochromatin in wild-type murine thymocytes, including percentages and statistical analyses, related to Figure 1**

**A. Recruitment of *Cd4* to pericentromeric heterochromatin in WT cells**

| Cell type                          | No recruitment |      | Monoallelic |      | Biallelic |      | Sample size<br>(cells) |
|------------------------------------|----------------|------|-------------|------|-----------|------|------------------------|
|                                    | number         | (%)  | number      | (%)  | number    | (%)  |                        |
| DN                                 | 40             | (51) | 31          | (39) | 8         | (10) | 79                     |
| DP                                 | 114            | (73) | 41          | (26) | 2         | (1)  | 157                    |
| CD4 <sup>+</sup> CD8 <sup>lo</sup> | 75             | (64) | 36          | (31) | 6         | (5)  | 117                    |
| CD4 SP                             | 83             | (64) | 42          | (32) | 5         | (4)  | 130                    |
| CD8 SP                             | 39             | (36) | 63          | (59) | 5         | (5)  | 107                    |

**B. Statistical analysis of *Cd4* recruitment to pericentromeric heterochromatin in WT cells**

| Cell type 1                        |        | Cell type 2                        | <i>P</i> value |
|------------------------------------|--------|------------------------------------|----------------|
| DN                                 | versus | DP                                 | 9.79e-04       |
|                                    |        | CD4 <sup>+</sup> CD8 <sup>lo</sup> | 2.21e-01       |
|                                    |        | CD4 SP                             | 1.41e-01       |
|                                    |        | CD8 SP                             | 4.61e-02       |
| DP                                 | versus | CD4 <sup>+</sup> CD8 <sup>lo</sup> | 2.05e-01       |
|                                    |        | CD4 SP                             | 2.96e-01       |
|                                    |        | CD8 SP                             | 1.20e-07       |
| CD4 <sup>+</sup> CD8 <sup>lo</sup> | versus | CD4 SP                             | 9.78e-01       |
|                                    |        | CD8 SP                             | 1.79e-04       |
| CD4 SP                             | versus | CD8 SP                             | 2.25e-04       |

**C. Recruitment of *Cd8* to pericentromeric heterochromatin in WT cells**

| Cell type                          | No recruitment |      | Monoallelic |      | Biallelic |      | Sample size<br>(cells) |
|------------------------------------|----------------|------|-------------|------|-----------|------|------------------------|
|                                    | number         | (%)  | number      | (%)  | number    | (%)  |                        |
| DN                                 | 59             | (72) | 20          | (24) | 3         | (4)  | 82                     |
| DP                                 | 94             | (61) | 55          | (36) | 5         | (3)  | 154                    |
| CD4 <sup>+</sup> CD8 <sup>lo</sup> | 39             | (30) | 75          | (58) | 16        | (12) | 130                    |
| CD4 SP                             | 45             | (36) | 71          | (57) | 9         | (7)  | 125                    |
| CD8 SP                             | 64             | (61) | 34          | (32) | 7         | (7)  | 105                    |

#### D. Statistical analysis of *Cd8* recruitment to pericentromeric heterochromatin in WT cells

| Cell type 1                        |        | Cell type 2                        | <i>P</i> value |
|------------------------------------|--------|------------------------------------|----------------|
| DN                                 | versus | DP                                 | 2.62e-01       |
|                                    |        | CD4 <sup>+</sup> CD8 <sup>lo</sup> | 6.00e-08       |
|                                    |        | CD4 SP                             | 7.19e-06       |
|                                    |        | CD8 SP                             | 4.14e-01       |
| DP                                 | versus | CD4 <sup>+</sup> CD8 <sup>lo</sup> | 1.09e-06       |
|                                    |        | CD4 SP                             | 3.43e-04       |
|                                    |        | CD8 SP                             | 5.93e-01       |
| CD4 <sup>+</sup> CD8 <sup>lo</sup> | versus | CD4 SP                             | 4.19e-01       |
|                                    |        | CD8 SP                             | 2.98e-05       |
| CD4 SP                             | versus | CD8 SP                             | 9.50e-04       |

#### E. Statistical analysis of *Cd4* versus *Cd8* recruitment to pericentromeric heterochromatin in WT cells

| Cell type                          | <i>P</i> value |
|------------------------------------|----------------|
| DN                                 | 3.69e-02       |
| DP                                 | 1.34e-01       |
| CD4 <sup>+</sup> CD8 <sup>lo</sup> | 1.42e-06       |
| CD4 SP                             | 1.15e-04       |
| CD8 SP                             | 1.05e-03       |

**Table S2. *Cd4* or *Cd8* recruitment to pericentromeric heterochromatin in wild-type, *E8<sub>I</sub>* deficient, and *E8<sub>I</sub>E8<sub>II</sub>* double mutant thymocytes, including percentages and statistical analyses, related to Figure 2**

**A. Recruitment of *Cd4* to pericentromeric heterochromatin in DP cells**

| Genotype                                                        | No recruitment |      | Monoallelic |      | Biallelic |     | Sample size |
|-----------------------------------------------------------------|----------------|------|-------------|------|-----------|-----|-------------|
|                                                                 | number         | (%)  | number      | (%)  | number    | (%) | (cells)     |
| WT                                                              | 95             | (66) | 43          | (30) | 6         | (4) | 144         |
| CD8 <sup>+</sup> <i>E8<sub>I</sub> Δ/Δ E8<sub>II</sub> Δ/Δ</i>  | 85             | (65) | 41          | (31) | 5         | (4) | 131         |
| CD8 <sup>lo</sup> <i>E8<sub>I</sub> Δ/Δ E8<sub>II</sub> Δ/Δ</i> | 107            | (67) | 47          | (29) | 6         | (4) | 160         |

**B. Statistical analysis of *Cd4* recruitment to pericentromeric heterochromatin in DP cells**

| Genotype 1                                                     |        | Genotype 2                                                      | <i>P</i> value |
|----------------------------------------------------------------|--------|-----------------------------------------------------------------|----------------|
| WT                                                             | versus | CD8 <sup>+</sup> <i>E8<sub>I</sub> Δ/Δ E8<sub>II</sub> Δ/Δ</i>  | 9.82e-01       |
| WT                                                             | versus | CD8 <sup>lo</sup> <i>E8<sub>I</sub> Δ/Δ E8<sub>II</sub> Δ/Δ</i> | 9.94e-01       |
| CD8 <sup>+</sup> <i>E8<sub>I</sub> Δ/Δ E8<sub>II</sub> Δ/Δ</i> | versus | CD8 <sup>lo</sup> <i>E8<sub>I</sub> Δ/Δ E8<sub>II</sub> Δ/Δ</i> | 9.38e-01       |

**C. Recruitment of *Cd8* to pericentromeric heterochromatin in DP cells**

| Genotype                                                        | No recruitment |      | Monoallelic |      | Biallelic |     | Sample size |
|-----------------------------------------------------------------|----------------|------|-------------|------|-----------|-----|-------------|
|                                                                 | number         | (%)  | number      | (%)  | number    | (%) | (cells)     |
| WT                                                              | 108            | (65) | 51          | (31) | 7         | (4) | 166         |
| CD8 <sup>+</sup> <i>E8<sub>I</sub> Δ/Δ E8<sub>II</sub> Δ/Δ</i>  | 57             | (48) | 55          | (47) | 6         | (5) | 118         |
| CD8 <sup>lo</sup> <i>E8<sub>I</sub> Δ/Δ E8<sub>II</sub> Δ/Δ</i> | 55             | (35) | 91          | (57) | 13        | (8) | 159         |

**D. Statistical analysis of *Cd8* recruitment to pericentromeric heterochromatin in DP cells**

| Genotype 1                                                     |        | Genotype 2                                                      | <i>P</i> value |
|----------------------------------------------------------------|--------|-----------------------------------------------------------------|----------------|
| WT                                                             | versus | CD8 <sup>+</sup> <i>E8<sub>I</sub> Δ/Δ E8<sub>II</sub> Δ/Δ</i>  | 2.60e-02       |
| WT                                                             | versus | CD8 <sup>lo</sup> <i>E8<sub>I</sub> Δ/Δ E8<sub>II</sub> Δ/Δ</i> | 6.90e-07       |
| CD8 <sup>+</sup> <i>E8<sub>I</sub> Δ/Δ E8<sub>II</sub> Δ/Δ</i> | versus | CD8 <sup>lo</sup> <i>E8<sub>I</sub> Δ/Δ E8<sub>II</sub> Δ/Δ</i> | 9.91e-02       |

**Table S3. *Cd4* recruitment to pericentromeric heterochromatin in wild-type, *Zbtb7b*<sup>hd/hd</sup> and ThPOK transgenic thymocytes, including percentages and statistical analyses, related to Figure 4**

A. Recruitment of *Cd4* to pericentromeric heterochromatin in CD4 SP cells

| Genotype                       | No recruitment |      | Monoallelic |      | Biallelic |     | Sample size |
|--------------------------------|----------------|------|-------------|------|-----------|-----|-------------|
|                                | number         | (%)  | number      | (%)  | number    | (%) | (cells)     |
| WT                             | 96             | (60) | 59          | (37) | 5         | (3) | 160         |
| <i>Zbtb7b</i> <sup>hd/hd</sup> | 40             | (31) | 76          | (59) | 12        | (9) | 128         |

B. Statistical analysis of *Cd4* recruitment to pericentromeric heterochromatin in CD4 SP cells

| Genotype 1 |        | Genotype 2                     | <i>P</i> value |
|------------|--------|--------------------------------|----------------|
| WT         | versus | <i>Zbtb7b</i> <sup>hd/hd</sup> | 1.14e-05       |

**Table S4. *Cd4* recruitment to pericentromeric heterochromatin in wild-type and *Cd4* PE deficient thymocytes, including percentages and statistical analyses, related to Figure 5**

**A. Recruitment of *Cd4* to pericentromeric heterochromatin**

| Cell type                          | Genotype                      | No recruitment |      | Monoallelic |      | Biallelic |      | Sample size<br>(cells) |
|------------------------------------|-------------------------------|----------------|------|-------------|------|-----------|------|------------------------|
|                                    |                               | number         | (%)  | number      | (%)  | number    | (%)  |                        |
| DN                                 | WT                            | 82             | (51) | 56          | (35) | 23        | (14) | 161                    |
|                                    | <i>Cd4</i> PE $\Delta/\Delta$ | 45             | (39) | 55          | (48) | 14        | (12) | 114                    |
| DP                                 | WT                            | 81             | (64) | 41          | (33) | 4         | (3)  | 126                    |
|                                    | <i>Cd4</i> PE $\Delta/\Delta$ | 73             | (63) | 39          | (34) | 4         | (3)  | 116                    |
| CD4 <sup>+</sup> CD8 <sup>lo</sup> | WT                            | 86             | (64) | 43          | (32) | 6         | (4)  | 135                    |
|                                    | <i>Cd4</i> PE $\Delta/\Delta$ | 36             | (41) | 40          | (46) | 11        | (13) | 87                     |
| CD4 SP                             | WT                            | 78             | (61) | 46          | (36) | 4         | (3)  | 128                    |
|                                    | <i>Cd4</i> PE $\Delta/\Delta$ | 47             | (42) | 54          | (48) | 11        | (10) | 112                    |
| CD8 SP                             | WT                            | 56             | (43) | 59          | (46) | 14        | (11) | 129                    |
|                                    | <i>Cd4</i> PE $\Delta/\Delta$ | 56             | (38) | 76          | (51) | 16        | (11) | 148                    |

**B. Statistical analysis of *Cd4* recruitment to pericentromeric heterochromatin**

| Genotype 1 | Cell type 1                        |        | Genotype 2                    | Cell type 2                        | <i>P</i> value |
|------------|------------------------------------|--------|-------------------------------|------------------------------------|----------------|
| WT         | DN                                 | versus | <i>Cd4</i> PE $\Delta/\Delta$ | DN                                 | 7.83e-02       |
|            | DP                                 | versus |                               | DP                                 | 9.70e-01       |
|            | CD4 <sup>+</sup> CD8 <sup>lo</sup> | versus |                               | CD4 <sup>+</sup> CD8 <sup>lo</sup> | 5.26e-03       |
|            | CD4 SP                             | versus |                               | CD4 SP                             | 1.15e-02       |
|            | CD8 SP                             | versus |                               | CD8 SP                             | 6.14e-01       |

**Table S5. *Cd8* recruitment to pericentromeric heterochromatin in wild-type and *Cd4* sil deficient thymocytes, including percentages and statistical analyses, related to Figure 6**

**A. Recruitment of *Cd8* to pericentromeric heterochromatin**

| Cell type                          | Genotype                       | No recruitment |      | Monoallelic |      | Biallelic |      | Sample size<br>(cells) |
|------------------------------------|--------------------------------|----------------|------|-------------|------|-----------|------|------------------------|
|                                    |                                | number         | (%)  | number      | (%)  | number    | (%)  |                        |
| DN                                 | WT                             | 52             | (50) | 47          | (45) | 6         | (6)  | 105                    |
|                                    | <i>Cd4</i> sil $\Delta/\Delta$ | 66             | (50) | 55          | (42) | 10        | (8)  | 131                    |
| DP                                 | WT                             | 71             | (68) | 32          | (30) | 2         | (2)  | 105                    |
|                                    | <i>Cd4</i> sil $\Delta/\Delta$ | 90             | (49) | 76          | (41) | 18        | (10) | 184                    |
| CD4 <sup>+</sup> CD8 <sup>lo</sup> | WT                             | 56             | (42) | 63          | (48) | 13        | (10) | 132                    |
|                                    | <i>Cd4</i> si $\Delta/\Delta$  | 41             | (33) | 66          | (53) | 17        | (14) | 124                    |
| CD4 SP                             | WT                             | 43             | (37) | 61          | (53) | 12        | (10) | 116                    |
|                                    | <i>Cd4</i> si $\Delta/\Delta$  | 46             | (30) | 80          | (52) | 27        | (18) | 153                    |
| CD8 SP                             | WT                             | 88             | (55) | 65          | (41) | 6         | (4)  | 159                    |
|                                    | <i>Cd4</i> sil $\Delta/\Delta$ | 64             | (40) | 76          | (47) | 21        | (13) | 161                    |

**B. Statistical analysis of *Cd8* recruitment to pericentromeric heterochromatin**

| Genotype 1 | Cell type 1                        |        | Genotype 2                     | Cell type 2                        | P value  |
|------------|------------------------------------|--------|--------------------------------|------------------------------------|----------|
| WT         | DN                                 | versus | <i>Cd4</i> sil $\Delta/\Delta$ | DN                                 | 9.29e-01 |
|            | DP                                 | versus |                                | DP                                 | 5.00e-03 |
|            | CD4 <sup>+</sup> CD8 <sup>lo</sup> | versus |                                | CD4 <sup>+</sup> CD8 <sup>lo</sup> | 2.63e-01 |
|            | CD4 SP                             | versus |                                | CD4 SP                             | 1.82e-01 |
|            | CD8 SP                             | versus |                                | CD8 SP                             | 3.26e-03 |
